# Supplementary material for: Initial Evidence of Variation by Ethnicity in the Relationship between Vitamin C Status and Mental States in Young Adults
Source: PubMed Central journal article supplement (PMC7997165; doi:10.3390/nu13030792), 2021-02-27
Supplement: nutrients-13-00792-s001.pdf [file nutrients-13-00792-s001.pdf]

## Supplementary Material

### Initial Evidence of Variation by Ethnicity in the Relationship Between Vitamin C Status and Mental States in Young Adults

Benjamin D. Fletcher<sup>1</sup>, Shay-Ruby Wickham<sup>1</sup>, Jayde A. M. Flett<sup>2</sup>, Juliet M. Pullar<sup>3</sup>, Margreet C. M. Vissers<sup>3</sup>, & Tamlin S. Conner<sup>1</sup>

1. Department of Psychology, University of Otago, Dunedin, 9016, New Zealand.
2. Independent researcher, Wellington, New Zealand.
3. Centre for Free Radical Research, Department of Pathology and Biomedical Science, University of Otago, Christchurch, 8011, New Zealand.

#### CONTENTS

[Supplementary Table 1.](#) Number of Participants with Deficient (<11 µmol/L), Marginal (11-23 µmol/L), Inadequate (23-50 µmol/L), Adequate (50-70 µmol/L), or Saturated (70+ µmol/L) Vitamin C Levels for the Total Sample and Each Ethnicity and Gender Subgroup.

[Supplementary Table 2.](#) Number of Participants and Mean Vitamin C levels (µmol/L) for the Total Sample and Each Ethnicity by Gender Subgroup.

[Supplementary Table 3.](#) Regression Models Predicting Total Mood Disturbance, Vitality and Perceived Stress from the Demographic Covariates and Vitamin C Levels, using Europeans as the Reference Group, with Moderators.

[Supplementary Table 4.](#) Regression Models Predicting the Profile of Mood States (POMS) Subscales (tension, depression, anger, fatigue, confusion, and vigor) from the Demographic Covariates and Vitamin C Levels, using Europeans as the Reference Group, with Moderators.

[Supplementary Table 5.](#) Regression Models Predicting Total Mood Disturbance, Vitality and Perceived Stress from the Demographic Covariates and Vitamin C Levels, using Māori/Pasifika as the Reference Group, with Moderators.

[Supplementary Table 6.](#) Regression Models Predicting the Profile of Mood States (POMS) Subscales (tension, depression, anger, fatigue, confusion, and vigor) from the Demographic Covariates and Vitamin C Levels, using Māori/Pasifika as the Reference Group, with Moderators.

[Supplementary Table 7.](#) Regression Models Predicting Total Mood Disturbance, Vitality and Perceived Stress from the Demographic Covariates and Vitamin C Levels, using Southeast/Other Asians as the Reference Group, with Moderators.

[Supplementary Table 8.](#) Regression Models Predicting the Profile of Mood States (POMS) Subscales (tension, depression, anger, fatigue, confusion, and vigor) from the Demographic Covariates and Vitamin C Levels, using Southeast/Other Asians as the Reference Group, with Moderators.

## Ethnicity, Vitamin C and Mental States

**Supplementary Table 1.** Number of Participants with Deficient (<11  $\mu\text{mol/L}$ ), Marginal (11-23  $\mu\text{mol/L}$ ), Inadequate (23-50  $\mu\text{mol/L}$ ), Adequate (50-70  $\mu\text{mol/L}$ ), or Saturated (70+  $\mu\text{mol/L}$ ) Vitamin C Levels for the Total Sample and Each Ethnicity and Gender Subgroup

|                       | Overall  | Vitamin C     | Deficient    | Marginal     | Inadequate   | Adequate     | Saturated    |
|-----------------------|----------|---------------|--------------|--------------|--------------|--------------|--------------|
|                       | <i>n</i> | Mean (SD)     | <i>n</i> (%) | <i>n</i> (%) | <i>n</i> (%) | <i>n</i> (%) | <i>n</i> (%) |
| Total Sample          | 419      | 54.90 (20.19) | 4 (1.0%)     | 19 (4.5%)    | 140 (33.4%)  | 168 (40.1%)  | 88 (21.0%)   |
| European              | 206      | 59.35 (19.35) | 0 (0.0%)     | 6 (2.9%)     | 63 (30.6%)   | 80 (38.8%)   | 57 (27.7%)   |
| East Asian            | 68       | 51.23 (19.16) | 1 (1.5%)     | 3 (4.4%)     | 26 (38.2%)   | 29 (42.6%)   | 9 (13.2%)    |
| Southeast/Other Asian | 61       | 41.83 (18.62) | 3 (4.9%)     | 5 (8.2%)     | 30 (49.2%)   | 19 (31.1%)   | 4 (6.6%)     |
| Maori and Pasifika    | 38       | 60.96 (16.80) | 0 (0.0%)     | 1 (2.6%)     | 7 (18.4%)    | 20 (52.6%)   | 10 (26.3%)   |
| Other                 | 46       | 52.76 (20.77) | 0 (0.0%)     | 4 (8.7%)     | 14 (30.4%)   | 20 (43.5%)   | 8 (17.4%)    |
| Gender                |          |               |              |              |              |              |              |
| Male                  | 135      | 52.55 (18.46) | 1 (0.7%)     | 8 (5.9%)     | 46 (34.1%)   | 60 (44.4%)   | 20 (14.8%)   |
| Female                | 284      | 56.02 (20.90) | 3 (1.1%)     | 11 (3.9%)    | 94 (33.1%)   | 108 (38.0%)  | 68 (23.9%)   |

*Note.* Percentage of participants displayed is out of the total number of participants per subgroup. SD = Standard Deviation

## Ethnicity, Vitamin C and Mental States

**Supplementary Table 2.** *Number of Participants and Mean Vitamin C levels ( $\mu\text{mol/L}$ ) for the Total Sample and Each Ethnicity by Gender Subgroup.*

|                       | Vitamin C in $\mu\text{mol/L}$ |          |               |          |               |
|-----------------------|--------------------------------|----------|---------------|----------|---------------|
|                       | Overall                        | Male     |               | Female   |               |
|                       | <i>n</i>                       | <i>n</i> | Mean (SD)     | <i>n</i> | Mean (SD)     |
| Total Sample          | 419                            | 135      | 52.55 (18.46) | 284      | 56.02 (20.89) |
| European              | 206                            | 80       | 55.26 (18.57) | 126      | 61.94 (19.72) |
| East Asian            | 68                             | 17       | 46.83 (19.40) | 51       | 52.69 (19.05) |
| Southeast/Other Asian | 61                             | 9        | 35.85 (12.29) | 52       | 42.86 (19.41) |
| Maori and Pasifika    | 38                             | 10       | 57.35 (8.50)  | 28       | 62.25 (18.87) |
| Other                 | 46                             | 19       | 51.63 (19.20) | 27       | 53.55 (22.14) |

*Note.* SD = Standard Deviation

## Ethnicity, Vitamin C and Mental States

**Supplementary Table 3.** Regression Models Predicting Total Mood Disturbance, Vitality and Perceived Stress from the Demographic Covariates and Vitamin C Levels, using Europeans as the Reference Group, with Moderators

|                                       | <b>Total Mood Disturbance</b> | <b>Vitality</b>   | <b>Perceived stress</b> |
|---------------------------------------|-------------------------------|-------------------|-------------------------|
|                                       | <b>b (SE)</b>                 | <b>b (SE)</b>     | <b>b (SE)</b>           |
| <b>Model 1- Unadjusted</b>            |                               |                   |                         |
| Constant                              | 9.876 (0.705)***              | 60.935 (0.738)*** | 5.305 (0.101)***        |
| Vitamin C                             | 0.002 (0.035)                 | 0.013 (0.037)     | -0.006 (0.005)          |
| Overall R <sup>2</sup>                | 0.000                         | 0.000             | 0.004                   |
| <b>Model 2 - Adjusted</b>             |                               |                   |                         |
| Constant                              | 7.742 (1.341)***              | 62.258 (1.41)***  | 4.832 (0.185)***        |
| Vitamin C                             | 0.008 (0.036)                 | 0.048 (0.038)     | -0.003 (0.005)          |
| SES                                   | -2.585 (0.580)***             | 1.981 (0.610)**   | -0.485 (0.080)***       |
| Gender                                | -0.705 (1.53)                 | -1.089 (1.608)    | -0.108 (0.211)          |
| Age                                   | -0.210 (0.221)                | 0.157 (0.232)     | -0.026 (0.03)           |
| Ethnicity D1 - East Asian             | 5.612 (2.052)**               | -1.256 (2.157)    | 1.613 (0.284)***        |
| Ethnicity D2 - Southeast Asian        | 3.183 (2.267)                 | 2.318 (2.384)     | 0.857 (0.313)**         |
| Ethnicity D3 - Māori/Pasifika         | 4.666 (2.487)†                | -7.959 (2.615)**  | 0.720 (0.344)*          |
| Ethnicity D4 - Other                  | 7.420 (2.375)**               | 0.030 (2.497)     | 0.861 (0.328)**         |
| R <sup>2</sup> Change                 | 0.071***                      | 0.062***          | 0.131***                |
| F Change (df)                         | 4.491 (7,410)                 | 3.887 (7,410)     | 8.828 (7,410)           |
| <b>Model 3- Adjusted + Moderators</b> |                               |                   |                         |
| Constant                              | 7.756 (1.358)***              | 62.288 (1.411)*** | 4.787 (0.186)***        |
| Vitamin C                             | 0.008 (0.073)                 | 0.121 (0.076)     | -0.004 (0.010)          |
| SES                                   | -2.597 (0.584)***             | 1.941 (0.606)**   | -0.482 (0.080)***       |
| Gender                                | -0.742 (1.536)                | -1.185 (1.596)    | -0.109 (0.211)          |
| Age                                   | -0.225 (0.222)                | 0.180 (0.231)     | -0.030 (0.031)          |
| Ethnicity D1 - East Asian             | 5.715 (2.074)**               | -1.277 (2.155)    | 1.632 (0.285)***        |
| Ethnicity D2 - Southeast Asian        | 5.062 (2.538)*                | -1.426 (2.637)    | 1.130 (0.348)**         |
| Ethnicity D3 - Māori/Pasifika         | 5.497 (2.638)*                | -9.511 (2.741)**  | 0.975 (0.362)**         |
| Ethnicity D4 - Other                  | 7.242 (2.384)**               | 0.301 (2.477)     | 0.863 (0.327)**         |
| Vitamin C x Gender                    | -0.001 (0.079)                | -0.067 (0.082)    | 0.012 (0.011)           |
| Vitamin C x Ethnicity D1              | 0.022 (0.103)                 | -0.063 (0.107)    | -0.011 (0.014)          |
| Vitamin C x Ethnicity D2              | 0.141 (0.111)                 | -0.309 (0.116)**  | 0.009 (0.015)           |
| Vitamin C x Ethnicity D3              | -0.138 (0.148)                | 0.252 (0.154)     | -0.044 (0.020)*         |
| Vitamin C x Ethnicity D4              | -0.100 (0.113)                | 0.080 (0.118)     | -0.027 (0.016)†         |
| R <sup>2</sup> Change                 | 0.009                         | 0.032*            | 0.020†                  |
| F Change (df)                         | 0.826 (5,405)                 | 2.821 (5,405)     | 1.879 (5,405)           |
| Overall R <sup>2</sup>                | 0.081                         | 0.094             | 0.154                   |

Note. b (SE) = unstandardized coefficient (Standard Error), SES = socioeconomic status, D = dummy code, †  $p < .10$   
\*  $p < .05$ ; \*\*  $p < .01$ ; \*\*\*  $p < .001$ .

## Ethnicity, Vitamin C and Mental States

**Supplementary Table 4.** Regression Models Predicting the Profile of Mood States (POMS) Subscales (tension, depression, anger, fatigue, confusion, and vigor) from the Demographic Covariates and Vitamin C Levels, using Europeans as the Reference Group, with Moderators

|                                        | Tension<br>b (SE) | Depression<br>b (SE) | Anger<br>b (SE)  | Fatigue<br>b (SE) | Confusion<br>b (SE) | Vigor<br>b (SE)   |
|----------------------------------------|-------------------|----------------------|------------------|-------------------|---------------------|-------------------|
| <b>Model 1 - Unadjusted</b>            |                   |                      |                  |                   |                     |                   |
| Constant                               | 4.792 (0.170)***  | 2.286 (0.128)***     | 2.644 (0.131)*** | 6.399 (0.186)***  | 4.721 (0.156)***    | 10.967 (0.178)*** |
| Vitamin C                              | 0.004 (0.008)     | -0.006 (0.006)       | -0.012 (0.007)†  | 0.013 (0.009)     | 0.001 (0.008)       | -0.001 (0.009)    |
| Overall R2                             | 0.001             | 0.002                | 0.008†           | 0.005             | 0.000               | 0.000             |
| <b>Model 2 - Adjusted</b>              |                   |                      |                  |                   |                     |                   |
| Constant                               | 4.386 (0.327)***  | 1.829 (0.240)***     | 2.385 (0.252)*** | 6.241 (0.360)***  | 4.539 (0.296)***    | 11.639 (0.340)*** |
| Vitamin C                              | 0.009 (0.009)     | 0.000 (0.006)        | -0.007 (0.007)   | 0.009 (0.010)     | 0.003 (0.008)       | 0.007 (0.009)     |
| SES                                    | -0.527 (0.141)*** | -0.488 (0.104)***    | -0.266 (0.109)*  | -0.447 (0.156)**  | -0.601 (0.128)***   | 0.255 (0.147)†    |
| Gender                                 | -0.354 (0.372)    | -0.247 (0.274)       | -0.401 (0.288)   | 0.032 (0.411)     | -0.464 (0.338)      | -0.729 (0.388)†   |
| Age                                    | -0.071 (0.054)    | -0.001 (0.040)       | 0.015 (0.042)    | -0.032 (0.059)    | -0.083 (0.049)†     | 0.038 (0.056)     |
| Ethnicity D1 - East Asian              | 1.146 (0.500)*    | 1.284 (0.368)**      | 0.961 (0.386)*   | -0.137 (0.551)    | 0.899 (0.453)*      | -1.458 (0.520)**  |
| Ethnicity D2 - Southeast Asian         | 1.459 (0.552)**   | 1.112 (0.407)**      | 0.914 (0.427)*   | -0.007 (0.609)    | 0.913 (0.500)†      | 1.208 (0.574)*    |
| Ethnicity D3 - Māori/Pasifika          | 0.570 (0.606)     | 0.389 (0.446)        | 1.141 (0.468)*   | 1.248 (0.668)†    | 0.441 (0.549)       | -0.876 (0.630)    |
| Ethnicity D4 - Other                   | 1.786 (0.578)**   | 1.996 (0.426)***     | 1.261 (0.447)**  | 0.420 (0.638)     | 1.613 (0.524)**     | -0.343 (0.602)    |
| R2 Change                              | 0.057**           | 0.098***             | 0.048**          | 0.034*            | 0.072***            | 0.062***          |
| F Change (df)                          | 3.554 (7,410)     | 6.396 (7,410)        | 2.965 (7,410)    | 2.097 (7,410)     | 4.537 (7,410)       | 3.861 (7,410)     |
| <b>Model 3 - Adjusted + Moderators</b> |                   |                      |                  |                   |                     |                   |
| Constant                               | 4.370 (0.331)***  | 1.782 (0.244)***     | 2.386 (0.257)*** | 6.252 (0.365)***  | 4.573 (0.299)***    | 11.607 (0.343)*** |
| Vitamin C                              | 0.026 (0.018)     | -0.002 (0.013)       | -0.012 (0.014)   | -0.008 (0.020)    | 0.011 (0.016)       | 0.006 (0.018)     |
| SES                                    | -0.535 (0.142)*** | -0.483 (0.105)***    | -0.263 (0.110)*  | -0.438 (0.157)**  | -0.612 (0.128)***   | 0.265 (0.147)†    |
| Gender                                 | -0.372 (0.374)    | -0.247 (0.276)       | -0.398 (0.290)   | 0.061 (0.412)     | -0.486 (0.338)      | -0.699 (0.388)†   |
| Age                                    | -0.068 (0.054)    | -0.006 (0.040)       | 0.012 (0.042)    | -0.034 (0.060)    | -0.084 (0.049)†     | 0.046 (0.056)     |
| Ethnicity D1 - East Asian              | 1.108 (0.505)*    | 1.294 (0.373)**      | 0.999 (0.392)*   | -0.184 (0.557)    | 0.914 (0.456)*      | -1.583 (0.524)**  |
| Ethnicity D2 - Southeast Asian         | 1.742 (0.618)**   | 1.161 (0.456)*       | 0.917 (0.480)†   | 0.616 (0.681)     | 1.474 (0.558)**     | 0.847 (0.641)     |
| Ethnicity D3 - Māori/Pasifika          | 0.901 (0.642)     | 0.472 (0.474)        | 1.129 (0.499)*   | 1.376 (0.708)†    | 0.639 (0.580)       | -0.979 (0.666)    |
| Ethnicity D4 - Other                   | 1.808 (0.580)**   | 2.013 (0.429)***     | 1.243 (0.451)**  | 0.378 (0.640)     | 1.551 (0.524)**     | -0.249 (0.602)    |
| Vitamin C x Gender                     | -0.010 (0.019)    | 0.013 (0.014)        | 0.005 (0.015)    | 0.011 (0.021)     | -0.013 (0.017)      | 0.006 (0.020)     |
| Vitamin C x Ethnicity D1               | -0.031 (0.025)    | -0.013 (0.019)       | 0.014 (0.019)    | 0.009 (0.028)     | 0.006 (0.023)       | -0.036 (0.026)    |
| Vitamin C x Ethnicity D2               | 0.011 (0.027)     | -0.008 (0.020)       | 0.002 (0.021)    | 0.059 (0.030)†    | 0.047 (0.024)†      | -0.031 (0.028)    |
| Vitamin C x Ethnicity D3               | -0.057 (0.036)    | -0.016 (0.027)       | 0.002 (0.028)    | -0.019 (0.040)    | -0.032 (0.033)      | 0.016 (0.037)     |
| Vitamin C x Ethnicity D4               | -0.013 (0.028)    | -0.020 (0.020)       | -0.006 (0.021)   | 0.006 (0.030)     | -0.024 (0.025)      | 0.044 (0.029)     |
| R2 Change                              | 0.011             | 0.005                | 0.002            | 0.012             | 0.016               | 0.016             |
| F Change (df)                          | 0.953 (5,405)     | 0.412 (5,405)        | 0.175 (5,405)    | 1.031 (5,405)     | 1.461 (5,405)       | 1.427 (5,405)     |
| Overall R2                             | 0.069             | 0.105                | 0.057            | 0.052             | 0.088               | 0.078             |

Note. b (SE) = unstandardized coefficient (Standard Error), SES = socioeconomic status, D = dummy code, †  $p < .10$ ; \*  $p < .05$ ; \*\*  $p < .01$ ; \*\*\*  $p < .001$ .

## Ethnicity, Vitamin C and Mental States

**Supplementary Table 5.** Regression Models Predicting Total Mood Disturbance, Vitality and Perceived Stress from the Demographic Covariates and Vitamin C Levels, using Māori/Pasifika as the Reference Group, with Moderators

|                                        | Total Mood<br>Disturbance<br>b (SE) | Vitality<br>b (SE) | Perceived stress<br>b (SE) |
|----------------------------------------|-------------------------------------|--------------------|----------------------------|
| <b>Model 1 - Adjusted</b>              |                                     |                    |                            |
| Constant                               | 12.408 (2.535)***                   | 54.299 (2.665)***  | 5.553 (0.350)***           |
| Vitamin C                              | 0.008 (0.036)                       | 0.048 (0.038)      | -0.003 (0.005)             |
| SES                                    | -2.585 (0.580)***                   | 1.981 (0.610)**    | -0.485 (0.80)***           |
| Gender                                 | -0.705 (1.530)                      | -1.089 (1.608)     | -0.108 (0.211)             |
| Age                                    | -0.210 (0.221)                      | 0.157 (0.232)      | -0.026 (0.030)             |
| Ethnicity D1 - European                | -4.666 (2.487)†                     | 7.959 (2.615)**    | -0.720 (0.344)*            |
| Ethnicity D2 - East Asian              | 0.946 (2.919)                       | 6.703 (3.069)*     | 0.893 (0.403)*             |
| Ethnicity D3 - Southeast Asian         | -1.483 (3.074)                      | 10.278 (3.232)**   | 0.137 (0.425)              |
| Ethnicity D4 - Other                   | 2.754 (3.173)                       | 7.990 (3.336)*     | 0.141 (0.438)              |
| R <sup>2</sup> Change                  | 0.071***                            | 0.063**            | 0.134***                   |
| F Change ( <i>df</i> )                 | 3.93 (8,410)                        | 3.419 (8,410)      | 7.938 (8,410)              |
| <b>Model 2 - Adjusted + Moderators</b> |                                     |                    |                            |
| Constant                               | 13.253 (2.664)***                   | 52.777 (2.767)***  | 5.762 (0.366)***           |
| Vitamin C                              | -0.130 (0.157)                      | 0.373 (0.163)*     | -0.048 (0.022)*            |
| SES                                    | -2.597 (0.584)***                   | 1.941 (0.606)**    | -0.482 (0.080)***          |
| Gender                                 | -0.742 (1.536)                      | -1.185 (1.596)     | -0.109 (0.211)             |
| Age                                    | -0.225 (0.222)                      | 0.180 (0.231)      | -0.030 (0.031)             |
| Ethnicity D1 - European                | -5.497 (2.638)*                     | 9.511 (2.741)**    | -0.975 (0.362)**           |
| Ethnicity D2 - East Asian              | 0.218 (3.044)                       | 8.233 (3.162)*     | 0.657 (0.418)              |
| Ethnicity D3 - Southeast Asian         | -0.435 (3.374)                      | 8.084 (3.505)*     | 0.155 (0.463)              |
| Ethnicity D4 - Other                   | 1.744 (3.280)                       | 9.812 (3.408)**    | -0.112 (0.450)             |
| Vitamin C x Gender                     | -0.001 (0.079)                      | -0.067 (0.082)     | 0.012 (0.011)              |
| Vitamin C x Ethnicity D1               | 0.138 (0.148)                       | -0.252 (0.154)     | 0.044 (0.020)*             |
| Vitamin C x Ethnicity D2               | 0.160 (0.165)                       | -0.315 (0.171)†    | 0.033 (0.023)              |
| Vitamin C x Ethnicity D3               | 0.279 (0.169)†                      | -0.560 (0.175)**   | 0.053 (0.023)*             |
| Vitamin C x Ethnicity D4               | 0.038 (0.173)                       | -0.171 (0.179)     | 0.017 (0.024)              |
| R <sup>2</sup> Change                  | 0.009                               | 0.032*             | 0.020†                     |
| F Change ( <i>df</i> )                 | 0.826 (5,405)                       | 2.821 (5,405)      | 1.879 (5,405)              |
| Overall R <sup>2</sup>                 | 0.081                               | 0.094              | 0.154                      |

Note. b (SE) = unstandardized coefficient (Standard Error), SES = socioeconomic status, D = dummy code, †  $p < .10$  \*  $p < .05$ ; \*\*  $p < .01$ ; \*\*\*  $p < .001$ .

## Ethnicity, Vitamin C and Mental States

**Supplementary Table 6.** Regression Models Predicting the Profile of Mood States (POMS) Subscales (tension, depression, anger, fatigue, confusion, and vigor) from the Demographic Covariates and Vitamin C Levels, using Māori/Pasifika as the Reference Group, with Moderators

|                                        | Tension<br>b (SE) | Depression<br>b (SE) | Anger<br>b (SE)  | Fatigue<br>b (SE) | Confusion<br>b (SE) | Vigor<br>b (SE)   |
|----------------------------------------|-------------------|----------------------|------------------|-------------------|---------------------|-------------------|
| <b>Model 1 - Adjusted</b>              |                   |                      |                  |                   |                     |                   |
| Constant                               | 4.956 (0.617)***  | 2.218 (0.455)***     | 3.526 (0.477)*** | 7.489 (0.681)***  | 4.98 (0.559)***     | 10.763 (0.642)*** |
| Vitamin C                              | 0.009 (0.009)     | 0.000 (0.006)        | -0.007 (0.007)   | 0.009 (0.010)     | 0.003 (0.008)       | 0.007 (0.009)     |
| SES                                    | -0.527 (0.141)*** | -0.488 (0.104)***    | -0.266 (0.109)*  | -0.447 (0.156)**  | -0.601 (0.128)***   | 0.255 (0.147)†    |
| Gender                                 | -0.354 (0.372)    | -0.247 (0.274)       | -0.401 (0.288)   | 0.032 (0.411)     | -0.464 (0.338)      | -0.729 (0.388)†   |
| Age                                    | -0.071 (0.054)    | -0.001 (0.040)       | 0.015 (0.042)    | -0.032 (0.059)    | -0.083 (0.049)†     | 0.038 (0.056)     |
| Ethnicity D1 - European                | -0.570 (0.606)    | -0.389 (0.446)       | -1.141 (0.468)*  | -1.248 (0.668)†   | -0.441 (0.549)      | 0.876 (0.630)     |
| Ethnicity D2 - East Asian              | 0.576 (0.711)     | 0.895 (0.524)†       | -0.180 (0.550)   | -1.385 (0.785)†   | 0.458 (0.644)       | -0.582 (0.740)    |
| Ethnicity D3 - Southeast Asian         | 0.889 (0.749)     | 0.722 (0.551)        | -0.227 (0.579)   | -1.255 (0.826)    | 0.471 (0.678)       | 2.084 (0.779)**   |
| Ethnicity D4 - Other                   | 1.216 (0.773)     | 1.607 (0.569)**      | 0.120 (0.597)    | -0.828 (0.853)    | 1.172 (0.700)†      | 0.533 (0.804)     |
| R2 Change                              | 0.058**           | 0.100***             | 0.055**          | 0.039*            | 0.072***            | 0.062**           |
| F Change (df)                          | 3.138 (8,410)     | 5.702 (8,410)        | 3.004 (8,410)    | 2.105 (8,410)     | 3.973 (8,410)       | 3.379 (8,410)     |
| <b>Model 2 - Adjusted + Moderators</b> |                   |                      |                  |                   |                     |                   |
| Constant                               | 5.271 (0.648)***  | 2.254 (0.479)***     | 3.515 (0.503)*** | 7.628 (0.715)***  | 5.212 (0.586)***    | 10.628 (0.673)*** |
| Vitamin C                              | -0.031 (0.038)    | -0.018 (0.028)       | -0.010 (0.030)   | -0.027 (0.042)    | -0.021 (0.034)      | 0.022 (0.040)     |
| SES                                    | -0.535 (0.142)*** | -0.483 (0.105)***    | -0.263 (0.110)*  | -0.438 (0.157)**  | -0.612 (0.128)***   | 0.265 (0.147)†    |
| Gender                                 | -0.372 (0.374)    | -0.247 (0.276)       | -0.398 (0.290)   | 0.061 (0.412)     | -0.486 (0.338)      | -0.699 (0.388)†   |
| Age                                    | -0.068 (0.054)    | -0.006 (0.040)       | 0.012 (0.042)    | -0.034 (0.060)    | -0.084 (0.049)†     | 0.046 (0.056)     |
| Ethnicity D1 - European                | -0.901 (0.642)    | -0.472 (0.474)       | -1.129 (0.499)*  | -1.376 (0.708)†   | -0.639 (0.580)      | 0.979 (0.666)     |
| Ethnicity D2 - East Asian              | 0.207 (0.741)     | 0.821 (0.547)        | -0.130 (0.575)   | -1.560 (0.817)†   | 0.275 (0.669)       | -0.604 (0.768)    |
| Ethnicity D3 - Southeast Asian         | 0.840 (0.821)     | 0.688 (0.607)        | -0.213 (0.638)   | -0.761 (0.906)    | 0.835 (0.742)       | 1.826 (0.852)*    |
| Ethnicity D4 - Other                   | 0.906 (0.798)     | 1.540 (0.590)**      | 0.114 (0.620)    | -0.998 (0.881)    | 0.912 (0.721)       | 0.730 (0.828)     |
| Vitamin C x Gender                     | -0.010 (0.019)    | 0.013 (0.014)        | 0.005 (0.015)    | 0.011 (0.021)     | -0.013 (0.017)      | 0.006 (0.020)     |
| Vitamin C x Ethnicity D1               | 0.057 (0.036)     | 0.016 (0.027)        | -0.002 (0.028)   | 0.019 (0.040)     | 0.032 (0.033)       | -0.016 (0.037)    |
| Vitamin C x Ethnicity D2               | 0.026 (0.040)     | 0.002 (0.030)        | 0.012 (0.031)    | 0.028 (0.044)     | 0.038 (0.036)       | -0.053 (0.042)    |
| Vitamin C x Ethnicity D3               | 0.068 (0.041)†    | 0.008 (0.030)        | 0.000 (0.032)    | 0.078 (0.045)†    | 0.079 (0.037)*      | -0.047 (0.043)    |
| Vitamin C x Ethnicity D4               | 0.044 (0.042)     | -0.004 (0.031)       | -0.008 (0.033)   | 0.026 (0.046)     | 0.008 (0.038)       | 0.028 (0.044)     |
| R2 Change                              | 0.011             | 0.005                | 0.002            | 0.012             | 0.016               | 0.016             |
| F Change (df)                          | 0.953 (5,405)     | 0.412 (5,405)        | 0.175 (5,405)    | 1.031 (5,405)     | 1.461 (5,405)       | 1.427 (5,405)     |
| Overall R2                             | 0.069             | 0.105                | 0.057            | 0.052             | 0.088               | 0.078             |

Note. b (SE) = unstandardized coefficient (Standard Error), SES = socioeconomic status, D = dummy code, †  $p < .10$  \*  $p < .05$ ; \*\*  $p < .01$ ; \*\*\*  $p < .001$ .

## Ethnicity, Vitamin C and Mental States

**Supplementary Table 7.** Regression Models Predicting Total Mood Disturbance, Vitality and Perceived Stress from the Demographic Covariates and Vitamin C Levels, using Southeast/Other Asians as the Reference Group, with Moderators

|                                      | Total Mood<br>Disturbance<br>b (SE) | Vitality<br>b (SE) | Perceived stress<br>b (SE) |
|--------------------------------------|-------------------------------------|--------------------|----------------------------|
| <b>Model 1 - Adjusted</b>            |                                     |                    |                            |
| Constant                             | 10.925 (2.363)***                   | 64.576 (2.484)***  | 5.689 (0.327)***           |
| Vitamin C                            | 0.008 (0.036)                       | 0.048 (0.038)      | -0.003 (0.005)             |
| SES                                  | -2.585 (0.580)***                   | 1.981 (0.610)**    | -0.485 (0.080)***          |
| Gender                               | -0.705 (1.530)                      | -1.089 (1.608)     | -0.108 (0.211)             |
| Age                                  | -0.210 (0.221)                      | 0.157 (0.232)      | -0.026 (0.030)             |
| Ethnicity D1 – European              | -3.183 (2.267)                      | -2.318 (2.384)     | -0.857 (0.313)**           |
| Ethnicity D2 – East Asian            | 2.429 (2.527)                       | -3.575 (2.656)     | 0.756 (0.349)*             |
| Ethnicity D3 – Māori/Pasifika        | 1.483 (3.074)                       | -10.278 (3.232)**  | -0.137 (0.425)             |
| Ethnicity D4 – Other                 | 4.237 (2.805)                       | -2.288 (2.950)     | 0.004 (0.388)              |
| R2 Change                            | 0.071***                            | 0.063**            | 0.134***                   |
| F Change (df)                        | 3.930 (8,410)                       | 3.419 (8,410)      | 7.938 (8,410)              |
| <b>Model 2 Adjusted + Moderators</b> |                                     |                    |                            |
| Constant                             | 12.818 (2.648)***                   | 60.862 (2.751)***  | 5.917 (0.364)***           |
| Vitamin C                            | 0.149 (0.121)                       | -0.188 (0.125)     | 0.005 (0.017)              |
| SES                                  | -2.597 (0.584)***                   | 1.941 (0.606)**    | -0.482 (0.080)***          |
| Gender                               | -0.742 (1.536)                      | -1.185 (1.596)     | -0.109 (0.211)             |
| Age                                  | -0.225 (0.222)                      | 0.180 (0.231)      | -0.030 (0.031)             |
| Ethnicity D1 – European              | -5.062 (2.538)*                     | 1.426 (2.637)      | -1.130 (0.348)**           |
| Ethnicity D2 – East Asian            | 0.653 (2.830)                       | 0.149 (2.940)      | 0.502 (0.389)              |
| Ethnicity D3 – Māori/Pasifika        | 0.435 (3.374)                       | -8.084 (3.505)*    | -0.155 (0.463)             |
| Ethnicity D4 – Other                 | 2.180 (3.067)                       | 1.727 (3.186)      | -0.267 (0.421)             |
| Vitamin C x Gender                   | -0.001 (0.079)                      | -0.067 (0.082)     | 0.012 (0.011)              |
| Vitamin C x Ethnicity D1             | -0.141 (0.111)                      | 0.309 (0.116)**    | -0.009 (0.015)             |
| Vitamin C x Ethnicity D2             | -0.119 (0.133)                      | 0.246 (0.138)†     | -0.020 (0.018)             |
| Vitamin C x Ethnicity D3             | -0.279 (0.169)†                     | 0.560 (0.175)**    | -0.053 (0.023)*            |
| Vitamin C x Ethnicity D4             | -0.241 (0.142)†                     | 0.389 (0.147)**    | -0.036 (0.019)†            |
| R2 Change                            | 0.009                               | 0.032*             | 0.020†                     |
| F Change (df)                        | 0.826 (5,405)                       | 2.821 (5,405)      | 1.879 (5,405)              |
| Overall R2                           | 0.081                               | 0.094              | 0.154                      |

Note. b (SE) = unstandardized coefficient (Standard Error), SES = socioeconomic status, D = dummy code, †  $p < .10$  \*  $p < .05$ ; \*\*  $p < .01$ ; \*\*\*  $p < .001$ .



**Supplementary Table 8.** Regression Models Predicting the Profile of Mood States (POMS) Subscales (tension, depression, anger, fatigue, confusion, and vigor) from the Demographic Covariates and Vitamin C Levels, using Southeast/Other Asians as the Reference Group, with Moderators

|                                        | Tension<br>b (SE) | Depression<br>b (SE) | Anger<br>b (SE)  | Fatigue<br>b (SE) | Confusion<br>b (SE) | Vigor<br>b (SE)   |
|----------------------------------------|-------------------|----------------------|------------------|-------------------|---------------------|-------------------|
| <b>Model 1 - Adjusted</b>              |                   |                      |                  |                   |                     |                   |
| Constant                               | 5.845 (0.575)***  | 2.941 (0.424)***     | 3.299 (0.445)*** | 6.234 (0.635)***  | 5.452 (0.521)***    | 12.846 (0.599)*** |
| Vitamin C                              | 0.009 (0.009)     | 0.000 (0.006)        | -0.007 (0.007)   | 0.009 (0.010)     | 0.003 (0.008)       | 0.007 (0.009)     |
| SES                                    | -0.527 (0.141)*** | -0.488 (0.104)***    | -0.266 (0.109)*  | -0.447 (0.156)**  | -0.601 (0.128)***   | 0.255 (0.147)†    |
| Gender                                 | -0.354 (0.372)    | -0.247 (0.274)       | -0.401 (0.288)   | 0.032 (0.411)     | -0.464 (0.338)      | -0.729 (0.388)†   |
| Age                                    | -0.071 (0.054)    | -0.001 (0.040)       | 0.015 (0.042)    | -0.032 (0.059)    | -0.083 (0.049)†     | 0.038 (0.056)     |
| Ethnicity D1 - European                | -1.459 (0.552)**  | -1.112 (0.407)**     | -0.914 (0.427)*  | 0.007 (0.609)     | -0.913 (0.500)†     | -1.208 (0.574)*   |
| Ethnicity D2 - East Asian              | -0.313 (0.615)    | 0.172 (0.453)        | 0.047 (0.476)    | -0.130 (0.679)    | -0.013 (0.558)      | -2.666 (0.640)*** |
| Ethnicity D3 - Māori/Pasifika          | -0.889 (0.749)    | -0.722 (0.551)       | 0.227 (0.579)    | 1.255 (0.826)     | -0.471 (0.678)      | -2.084 (0.779)**  |
| Ethnicity D4 - Other                   | 0.327 (0.683)     | 0.885 (0.503)†       | 0.347 (0.528)    | 0.427 (0.754)     | 0.701 (0.619)       | -1.551 (0.711)*   |
| R2 Change                              | 0.058**           | 0.100***             | 0.055**          | 0.039*            | 0.072***            | 0.062**           |
| F Change (df)                          | 3.138 (8,410)     | 5.702 (8,410)        | 3.004 (8,410)    | 2.105 (8,410)     | 3.973 (8,410)       | 3.379 (8,410)     |
| <b>Model 2 – Adjusted + Moderators</b> |                   |                      |                  |                   |                     |                   |
| Constant                               | 6.112 (0.644)***  | 2.943 (0.476)***     | 3.302 (0.500)*** | 6.868 (0.711)***  | 6.047 (0.582)***    | 12.454 (0.668)*** |
| Vitamin C                              | 0.037 (0.029)     | -0.010 (0.022)       | -0.011 (0.023)   | 0.051 (0.032)     | 0.057 (0.027)*      | -0.025 (0.030)    |
| SES                                    | -0.535 (0.142)*** | -0.483 (0.105)***    | -0.263 (0.110)*  | -0.438 (0.157)**  | -0.612 (0.128)***   | 0.265 (0.147)†    |
| Gender                                 | -0.372 (0.374)    | -0.247 (0.276)       | -0.398 (0.290)   | 0.061 (0.412)     | -0.486 (0.338)      | -0.699 (0.388)†   |
| Age                                    | -0.068 (0.054)    | -0.006 (0.040)       | 0.012 (0.042)    | -0.034 (0.060)    | -0.084 (0.049)†     | 0.046 (0.056)     |
| Ethnicity D1 - European                | -1.742 (0.618)**  | -1.161 (0.456)*      | -0.917 (0.480)†  | -0.616 (0.681)    | -1.474 (0.558)**    | -0.847 (0.641)    |
| Ethnicity D2 - East Asian              | -0.633 (0.689)    | 0.133 (0.509)        | 0.083 (0.535)    | -0.799 (0.760)    | -0.560 (0.622)      | -2.430 (0.714)**  |
| Ethnicity D3 - Māori/Pasifika          | -0.840 (0.821)    | -0.688 (0.607)       | 0.213 (0.638)    | 0.761 (0.906)     | -0.835 (0.742)      | -1.826 (0.852)*   |
| Ethnicity D4 - Other                   | 0.066 (0.746)     | 0.852 (0.551)        | 0.326 (0.580)    | -0.238 (0.823)    | 0.077 (0.674)       | -1.096 (0.774)    |
| Vitamin C x Gender                     | -0.010 (0.019)    | 0.013 (0.014)        | 0.005 (0.015)    | 0.011 (0.021)     | -0.013 (0.017)      | 0.006 (0.020)     |
| Vitamin C x Ethnicity D1               | -0.011 (0.027)    | 0.008 (0.020)        | -0.002 (0.021)   | -0.059 (0.030)†   | -0.047 (0.024)†     | 0.031 (0.028)     |
| Vitamin C x Ethnicity D2               | -0.042 (0.032)    | -0.005 (0.024)       | 0.013 (0.025)    | -0.049 (0.036)    | -0.041 (0.029)      | -0.006 (0.034)    |
| Vitamin C x Ethnicity D3               | -0.068 (0.041)†   | -0.008 (0.030)       | 0.000 (0.032)    | -0.078 (0.045)†   | -0.079 (0.037)*     | 0.047 (0.043)     |
| Vitamin C x Ethnicity D4               | -0.024 (0.035)    | -0.012 (0.025)       | -0.007 (0.027)   | -0.052 (0.038)    | -0.071 (0.031)*     | 0.075 (0.036)*    |
| R2 Change                              | 0.011             | 0.005                | 0.002            | 0.012             | 0.016               | 0.016             |
| F Change (df)                          | 0.953 (5,405)     | 0.412 (5,405)        | 0.175 (5,405)    | 1.031 (5,405)     | 1.461 (5,405)       | 1.427 (5,405)     |
| Overall R2                             | 0.069             | 0.105                | 0.057            | 0.052             | 0.088               | 0.078             |

Note. b (SE) = unstandardized coefficient (Standard Error), SES = socioeconomic status, D = dummy code, †  $p < .10$  \*  $p < .05$ ; \*\*  $p < .01$ ; \*\*\*  $p < .001$ .
